# Supplementary material
Source: Springer Nature journal article supplement (https://www.springermedizin.de/resource/supplementary/13058_2009_2559_MOESM2_ESM.pdf/9701698)

**(A)**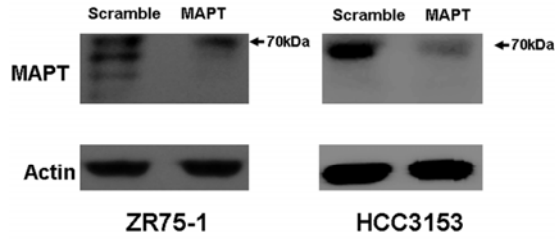**(B)**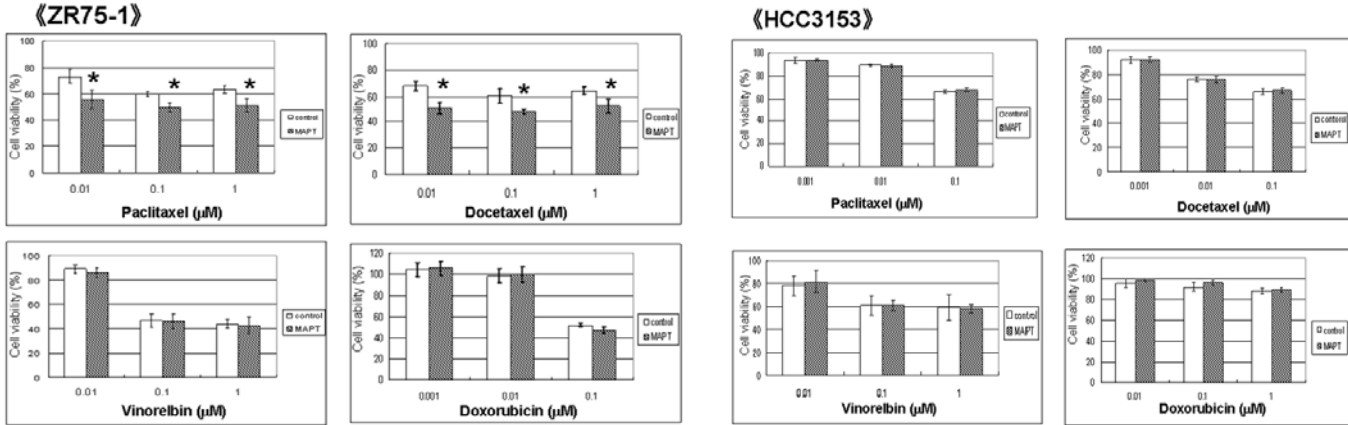**(C)**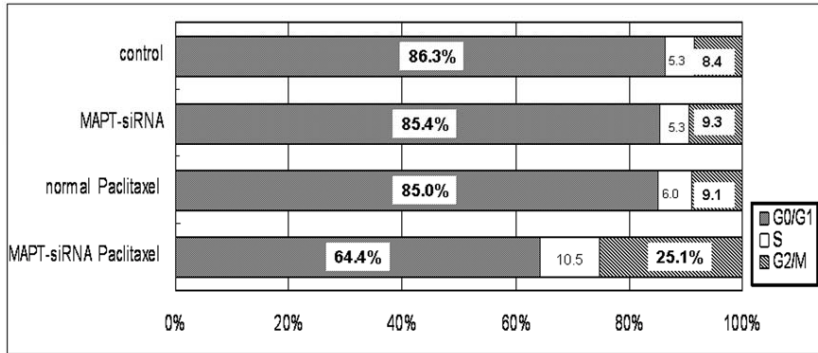**(D)**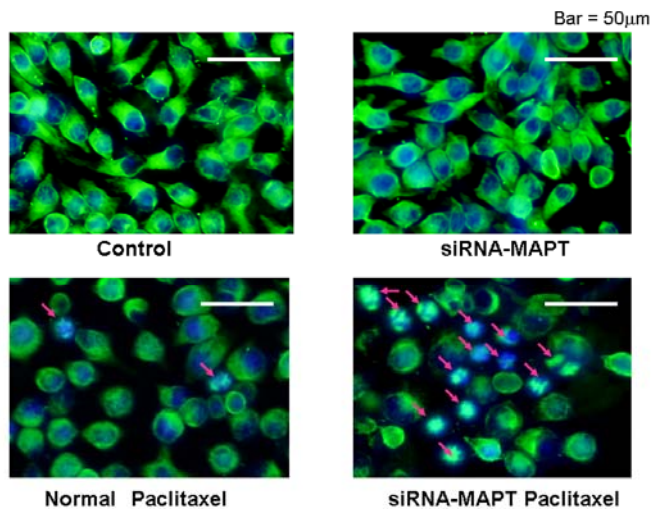

Supplement: MOESM2 [file 9701698]
